# Supplementary material
Source: PubMed Central journal article supplement (PMC2253977)
Supplement: mmc1.pdf [file mmc1.pdf]

## Supplemental Data

### Genome-Wide Association Study Identifies

### Novel Genes for Biomarkers of Cardiovascular Disease:

### Serum Urate and Dyslipidemia

Chris Wallace, Stephen J. Newhouse, Peter Braund, Feng Zhang, Martin Tobin, Mario Falchi, Kouros Ahmadi, Richard J. Dobson, Ana Carolina B. Marçano, Coher Hajat, Paul Burton, Panagiotis Deloukas, Morris Brown, John M. Connell, Anna Dominiczak, G. Mark Lathrop, John Webster, The Wellcome Trust Case Control Consortium, Martin Farrall, Tim Spector, Nilesh J. Samani, Mark J. Caulfield, and Patricia B. Munroe

### Membership of the WTCCC

**Management Committee:** Paul R Burton<sup>1</sup>, David G Clayton<sup>2</sup>, Lon R Cardon<sup>3</sup>, Nick Craddock<sup>4</sup>, Panos Deloukas<sup>5</sup>, Audrey Duncanson<sup>6</sup>, Dominic P Kwiatkowski<sup>3,5</sup>, Mark I McCarthy<sup>3,7</sup>, Willem H Ouwehand<sup>8,9</sup>, Nilesh J Samani<sup>10</sup>, John A Todd<sup>2</sup>, Peter Donnelly (Chair)<sup>11</sup>

**Analysis Committee:** Jeffrey C Barrett<sup>3</sup>, Paul R Burton<sup>1</sup>, Dan Davison<sup>11</sup>, Peter Donnelly<sup>11</sup>, Doug Easton<sup>12</sup>, David Evans<sup>3</sup>, Hin-Tak Leung<sup>2</sup>, Jonathan L Marchini<sup>11</sup>, Andrew P Morris<sup>3</sup>, Chris CA Spencer<sup>11</sup>, Martin D Tobin<sup>1</sup>, Lon R Cardon (Co-chair)<sup>3</sup>, David G Clayton (Co-chair)<sup>2</sup>

**UK Blood Services & University of Cambridge Controls:** Antony P Attwood<sup>5,8</sup>, James P Boorman<sup>8,9</sup>, Barbara Cant<sup>8</sup>, Ursula Everson<sup>13</sup>, Judith M Hussey<sup>14</sup>, Jennifer D Jolley<sup>8</sup>, Alexandra S Knight<sup>8</sup>, Kerstin Koch<sup>8</sup>, Elizabeth Meech<sup>15</sup>, Sarah Nutland<sup>2</sup>, Christopher V Prowse<sup>16</sup>, Helen E Stevens<sup>2</sup>, Niall C Taylor<sup>8</sup>, Graham R Walters<sup>17</sup>, Neil M Walker<sup>2</sup>, Nicholas A Watkins<sup>8,9</sup>, Thilo Winzer<sup>8</sup>, John A Todd<sup>2</sup>, Willem H Ouwehand<sup>8,9</sup>

**1958 Birth Cohort Controls:** Richard W Jones<sup>18</sup>, Wendy L McArdle<sup>18</sup>, Susan M Ring<sup>18</sup>, David P Strachan<sup>19</sup>, Marcus Pembrey<sup>18,20</sup>

**Bipolar Disorder (Aberdeen):** Gerome Breen<sup>21</sup>, David St Clair<sup>21</sup>; **(Birmingham):** Sian Caesar<sup>22</sup>, Katherine Gordon-Smith<sup>22,23</sup>, Lisa Jones<sup>22</sup>; **(Cardiff):** Christine Fraser<sup>23</sup>, Elaine K Green<sup>23</sup>, Detelina Grozeva<sup>23</sup>, Marian L Hamshere<sup>23</sup>, Peter A Holmans<sup>23</sup>, Ian R Jones<sup>23</sup>, George Kirov<sup>23</sup>, Valentina Moskvina<sup>23</sup>, Ivan Nikolov<sup>23</sup>, Michael C O'Donovan<sup>23</sup>, Michael J Owen<sup>23</sup>, Nick Craddock<sup>23</sup>; **(London):** David A Collier<sup>24</sup>, Amanda Elkin<sup>24</sup>, Anne Farmer<sup>24</sup>, Richard Williamson<sup>24</sup>, Peter McGuffin<sup>24</sup>; **(Newcastle):** Allan H Young<sup>25</sup>, I Nicol Ferrier<sup>25</sup>

**Coronary Artery Disease (Leeds):** Stephen G Ball<sup>26</sup>, Anthony J Balmforth<sup>26</sup>, Jennifer H Barrett<sup>26</sup>, D Timothy Bishop<sup>26</sup>, Mark M Iles<sup>26</sup>, Azhar Maqbool<sup>26</sup>, Nadira Yuldasheva<sup>26</sup>, Alistair S Hall<sup>26</sup>; **(Leicester):** Peter S Braund<sup>10</sup>, Paul R Burton<sup>1</sup>, Richard J Dixon<sup>10</sup>, Massimo Mangino<sup>10</sup>, Suzanne Stevens<sup>10</sup>, Martin D Tobin<sup>1</sup>, John R Thompson<sup>1</sup>, Nilesh J Samani<sup>10</sup>

**Crohn's Disease (Cambridge):** Francesca Bredin<sup>27</sup>, Mark Tremelling<sup>27</sup>, Miles Parkes<sup>27</sup>; **(Edinburgh):** Hazel Drummond<sup>28</sup>, Charles W Lees<sup>28</sup>, Elaine R Nimmo<sup>28</sup>, Jack Satsangi<sup>28</sup>; **(London):** Sheila A Fisher<sup>29</sup>, Alastair Forbes<sup>30</sup>, Cathryn M Lewis<sup>29</sup>, Clive M Onnie<sup>29</sup>, Natalie J Prescott<sup>29</sup>, Jeremy Sanderson<sup>31</sup>

Christopher G Mathew<sup>29</sup> ; (**Newcastle**): Jamie Barbour<sup>32</sup> , M Khalid Mohiuddin<sup>32</sup> , Catherine E Todhunter<sup>32</sup> , John C Mansfield<sup>32</sup> ; (**Oxford**): Tariq Ahmad<sup>33</sup> , Fraser R Cummings<sup>33</sup> , Derek P Jewell<sup>33</sup>

**Hypertension (Aberdeen)**: John Webster<sup>34</sup> ; (**Cambridge**): Morris J Brown<sup>35</sup> , David G Clayton<sup>2</sup> ; (**Evry, France**): G Mark Lathrop<sup>36</sup> ; (**Glasgow**): John Connell<sup>37</sup> , Anna Dominiczak<sup>37</sup> ; (**Leicester**): Nilesh J Samani<sup>10</sup> ; (**London**): Carolina A Braga Marcano<sup>38</sup> , Beverley Burke<sup>38</sup> , Richard Dobson<sup>38</sup> , Johannie Gungadoo<sup>38</sup> , Kate L Lee<sup>38</sup> , Patricia B Munroe<sup>38</sup> , Stephen J Newhouse<sup>38</sup> , Abiodun Onipinla<sup>38</sup> , Chris Wallace<sup>38</sup> , Mingzhan Xue<sup>38</sup> , Mark Caulfield<sup>39</sup> ; (**Oxford**): Martin Farrall

**Rheumatoid Arthritis**: Anne Barton<sup>40</sup> , The Biologics in RA Genetics and Genomics Study Syndicate (BRAGGS) Steering Committee\* , Ian N Bruce<sup>40</sup> , Hannah Donovan<sup>40</sup> , Steve Eyre<sup>40</sup> , Paul D Gilbert<sup>40</sup> , Samantha L Hider<sup>40</sup> , Anne M Hinks<sup>40</sup> , Sally L John<sup>40</sup> , Catherine Potter<sup>40</sup> , Alan J Silman<sup>40</sup> , Deborah PM Symmons<sup>40</sup> , Wendy Thomson<sup>40</sup> , Jane Worthington<sup>40</sup>

**Type 1 Diabetes**: David G Clayton<sup>2</sup> , David B Dunger<sup>2,41</sup> , Sarah Nutland<sup>2</sup> , Helen E Stevens<sup>2</sup> , Neil M Walker<sup>2</sup> , Barry Widmer<sup>2,41</sup> , John A Todd<sup>2</sup>

**Type 2 Diabetes (Exeter)**: Timothy M Frayling<sup>42,43</sup> , Rachel M Freathy<sup>42,43</sup> , Hana Lango<sup>42,43</sup> , John R B Perry<sup>42,43</sup> , Beverley M Shields<sup>43</sup> , Michael N Weedon<sup>42,43</sup> , Andrew T Hattersley<sup>42,43</sup> ; (**London**): Graham A Hitman<sup>44</sup> ; (**Newcastle**): Mark Walker<sup>45</sup> ; (**Oxford**): Kate S Elliott<sup>3,7</sup> , Christopher J Groves<sup>7</sup> , Cecilia M Lindgren<sup>3,7</sup> , Nigel W Rayner<sup>3,7</sup> , Nicholas J Timpson<sup>3,46</sup> , Eleftheria Zeggini<sup>3,7</sup> , Mark I McCarthy<sup>3,7</sup>

**Tuberculosis (Gambia)**: Melanie Newport<sup>47</sup> , Giorgio Sirugo<sup>47</sup> ; (**Oxford**): Emily Lyons<sup>3</sup> , Fredrik Vannberg<sup>3</sup> , Adrian VS Hill<sup>3</sup>

**Ankylosing Spondylitis**: Linda A Bradbury<sup>48</sup> , Claire Farrar<sup>49</sup> , Jennifer J Pointon<sup>48</sup> , Paul Wordsworth<sup>49</sup> , Matthew A Brown<sup>48,49</sup>

**AutoImmune Thyroid Disease**: Jayne A Franklyn<sup>50</sup> , Joanne M Heward<sup>50</sup> , Matthew J Simmonds<sup>50</sup> , Stephen CL Gough<sup>50</sup>

**Breast Cancer**: Sheila Seal<sup>51</sup> , Breast Cancer Susceptibility Collaboration (UK)\* ,

Michael R Stratton<sup>51,52</sup> , Nazneen Rahman<sup>51</sup>

**Multiple Sclerosis**: Maria Ban<sup>53</sup> , An Goris<sup>53</sup> , Stephen J Sawcer<sup>53</sup> , Alastair Compston<sup>53</sup>

**Gambian Controls (Gambia)**: David Conway<sup>47</sup> , Muminatou Jallow<sup>47</sup> , Melanie Newport<sup>47</sup> , Giorgio Sirugo<sup>47</sup> ; (**Oxford**): Kirk A Rockett<sup>3</sup> , Dominic P Kwiatkowski<sup>3,5</sup>

**DNA, Genotyping, Data QC and Informatics (Wellcome Trust Sanger Institute, Hinxton)**: Claire Bryan<sup>5</sup> , Suzannah J Bumpstead<sup>5</sup> , Amy Chaney<sup>5</sup> , Kate Downes<sup>2,5</sup> , Jilur Ghoris<sup>5</sup> , Rhian Gwilliam<sup>5</sup> , Sarah E Hunt<sup>5</sup> , Michael Inouye<sup>5</sup> , Andrew Keniry<sup>5</sup> , Emma King<sup>5</sup> , Ralph McGinnis<sup>5</sup> , Simon Potter<sup>5</sup> , Rathi Ravindrarajah<sup>5</sup> , Pamela Whittaker<sup>5</sup> , David Withers<sup>5</sup> , Panos Deloukas<sup>5</sup> ; (**Cambridge**): Hin-Tak Leung<sup>2</sup> , Sarah Nutland<sup>2</sup> , Helen E Stevens<sup>2</sup> , Neil M Walker<sup>2</sup> , John A Todd<sup>2</sup>

**Statistics (Cambridge)**: Doug Easton<sup>12</sup> , David G Clayton<sup>2</sup> ; (**Leicester**): Paul R Burton<sup>1</sup> , Martin D Tobin<sup>1</sup> ; (**Oxford**): Jeffrey C Barrett<sup>3</sup> , David Evans<sup>3</sup> , Andrew P Morris<sup>3</sup> , Lon R Cardon<sup>3</sup> ; (**Oxford**): Niall J Cardin<sup>11</sup> , Dan Davison<sup>11</sup> , Teresa Ferreira<sup>11</sup> , Joanne Pereira-Gale<sup>11</sup> , Ingeleif B Hallgrimsdóttir<sup>11</sup> , Bryan N Howie<sup>11</sup> , Jonathan L Marchini<sup>11</sup> , Chris CA Spencer<sup>11</sup> , Zhan Su<sup>11</sup> , Yik Ying Teo<sup>3,11</sup> , Damjan Vukcevic<sup>11</sup> , Peter Donnelly<sup>11</sup>

**PIs:** David Bentley<sup>5,54</sup>, Matthew A Brown<sup>48,49</sup>, Lon R Cardon<sup>3</sup>, Mark Caulfield<sup>38</sup>, David G Clayton<sup>2</sup>, Alistair Compston<sup>53</sup>, Nick Craddock<sup>23</sup>, Panos Deloukas<sup>5</sup>, Peter Donnelly<sup>11</sup>, Martin Farrall<sup>39</sup>, Stephen CL Gough<sup>50</sup>, Alistair S Hall<sup>26</sup>, Andrew T Hattersley<sup>42,43</sup>, Adrian VS Hill<sup>3</sup>, Dominic P Kwiatkowski<sup>3,5</sup>, Christopher G Mathew<sup>29</sup>, Mark I McCarthy<sup>3,7</sup>, Willem H Ouwehand<sup>8,9</sup>, Miles Parkes<sup>27</sup>, Marcus Pembrey<sup>18,20</sup>, Nazneen Rahman<sup>51</sup>, Nilesh J Samani<sup>10</sup>, Michael R Stratton<sup>51,52</sup>, John A Todd<sup>2</sup>, Jane Worthington<sup>40</sup>

<sup>1</sup> Genetic Epidemiology Group, Department of Health Sciences, University of Leicester, Adrian Building, University Road, Leicester, LE1 7RH, UK; <sup>2</sup> Juvenile Diabetes Research Foundation/Wellcome Trust Diabetes and Inflammation Laboratory, Department of Medical Genetics, Cambridge Institute for Medical Research, University of Cambridge, Wellcome Trust/MRC Building, Cambridge, CB2 0XY, UK; <sup>3</sup> Wellcome Trust Centre for Human Genetics, University of Oxford, Roosevelt Drive, Oxford OX3 7BN, UK; <sup>4</sup> Department of Psychological Medicine, Henry Wellcome Building, School of Medicine, Cardiff University, Heath Park, Cardiff CF14 4XN, UK; <sup>5</sup> The Wellcome Trust Sanger Institute, Wellcome Trust Genome Campus, Hinxton, Cambridge CB10 1SA, UK; <sup>6</sup> The Wellcome Trust, Gibbs Building, 215 Euston Road, London NW1 2BE, UK; <sup>7</sup> Oxford Centre for Diabetes, Endocrinology and Medicine, University of Oxford, Churchill Hospital, Oxford, OX3 7LJ, UK; <sup>8</sup> Department of Haematology, University of Cambridge, Long Road, Cambridge, CB2 2PT, UK; <sup>9</sup> National Health Service Blood and Transplant, Cambridge Centre, Long Road, Cambridge, CB2 2PT, UK; <sup>10</sup> Department of Cardiovascular Sciences, University of Leicester, Glenfield Hospital, Groby Road, Leicester, LE3 9QP, UK; <sup>11</sup> Department of Statistics, University of Oxford, 1 South Parks Road, Oxford OX1 3TG, UK; <sup>12</sup> Cancer Research UK Genetic Epidemiology Unit, Strangeways Research Laboratory, Worts Causeway, Cambridge CB1 8RN, UK; <sup>13</sup> National Health Service Blood and Transplant, Sheffield Centre, Longley Lane, Sheffield S5 7JN, UK; <sup>14</sup> National Health Service Blood and Transplant, Brentwood Centre, Crescent Drive, Brentwood, CM15 8DP, UK; <sup>15</sup> The Welsh Blood Service, Ely Valley Road, Talbot Green, Pontyclun, CF72 9WB, UK; <sup>16</sup> The Scottish National Blood Transfusion Service, Ellen's Glen Road, Edinburgh, EH17 7QT, UK; <sup>17</sup> National Health Service Blood and Transplant, Southampton Centre, Coxford Road, Southampton, SO16 5AF, UK; <sup>18</sup> Avon Longitudinal Study of Parents and Children, University of Bristol, 24 Tyndall Avenue, Bristol, BS8 1TQ, UK; <sup>19</sup> Division of Community Health Services, St George's University of London, Cranmer Terrace, London SW17 0RE, UK; <sup>20</sup> Institute of Child Health, University College London, 30 Guilford St, London WC1N 1EH, UK; <sup>21</sup> University of Aberdeen, Institute of Medical Sciences, Foresterhill, Aberdeen, AB25 2ZD, UK; <sup>22</sup> Department of Psychiatry, Division of Neuroscience, Birmingham University, Birmingham, B15 2QZ, UK; <sup>23</sup> Department of Psychological Medicine, Henry Wellcome Building, School of Medicine, Cardiff University, Heath Park, Cardiff CF14 4XN, UK; <sup>24</sup> SGDP, The Institute of Psychiatry, King's College London, De Crespigny Park Denmark Hill London SE5 8AF, UK; <sup>25</sup> School of Neurology, Neurobiology and Psychiatry, Royal Victoria Infirmary, Queen Victoria Road, Newcastle upon Tyne, NE1 4LP, UK; <sup>26</sup> LIGHT and LImm Research Institutes, Faculty of Medicine and Health, University of Leeds, Leeds, LS1 3EX, UK; <sup>27</sup> IBD Research Group, Addenbrooke's Hospital, University of Cambridge, Cambridge, CB2 2QQ, UK; <sup>28</sup> Gastrointestinal Unit, School of Molecular and Clinical Medicine, University of Edinburgh, Western General Hospital, Edinburgh EH4 2XU, UK; <sup>29</sup> Department of Medical & Molecular Genetics, King's College London School of Medicine, 8th Floor Guy's Tower, Guy's Hospital, London, SE1 9RT, UK; <sup>30</sup> Institute for Digestive Diseases, University College London Hospitals Trust, London, NW1 2BU, UK; <sup>31</sup> Department of Gastroenterology, Guy's and St Thomas' NHS Foundation Trust, London, SE1 7EH, UK; <sup>32</sup> Department of Gastroenterology & Hepatology, University of Newcastle upon Tyne, Royal Victoria Infirmary, Newcastle upon Tyne, NE1 4LP, UK; <sup>33</sup> Gastroenterology Unit, Radcliffe Infirmary, University of Oxford, Oxford, OX2 6HE, UK; <sup>34</sup> Medicine and

Therapeutics, Aberdeen Royal Infirmary, Foresterhill, Aberdeen, Grampian AB9 2ZB, UK; <sup>35</sup> Clinical Pharmacology Unit and the Diabetes and Inflammation Laboratory, University of Cambridge, Addenbrookes Hospital, Hills Road, Cambridge CB2 2QQ, UK; <sup>36</sup> Centre National de Genotypage, 2, Rue Gaston Cremieux, Evry, Paris 91057.; <sup>37</sup> BHF Glasgow Cardiovascular Research Centre, University of Glasgow, 126 University Place, Glasgow, G12 8TA, UK; <sup>38</sup> Clinical Pharmacology and Barts and The London Genome Centre, William Harvey Research Institute, Barts and The London, Queen Mary's School of Medicine, Charterhouse Square, London EC1M 6BQ, UK; <sup>39</sup> Cardiovascular Medicine, University of Oxford, Wellcome Trust Centre for Human Genetics, Roosevelt Drive, Oxford OX3 7BN, UK; <sup>40</sup> arc Epidemiology Research Unit, University of Manchester, Stopford Building, Oxford Rd, Manchester, M13 9PT, UK; <sup>41</sup> Department of Paediatrics, University of Cambridge, Addenbrooke's Hospital, Cambridge, CB2 2QQ, UK; <sup>42</sup> Genetics of Complex Traits, Institute of Biomedical and Clinical Science, Peninsula Medical School, Magdalen Road, Exeter EX1 2LU UK; <sup>43</sup> Diabetes Genetics, Institute of Biomedical and Clinical Science, Peninsula Medical School, Barrack Road, Exeter EX2 5DU UK; <sup>44</sup> Centre for Diabetes and Metabolic Medicine, Barts and The London, Royal London Hospital, Whitechapel, London, E1 1BB UK; <sup>45</sup> Diabetes Research Group, School of Clinical Medical Sciences, Newcastle University, Framlington Place, Newcastle upon Tyne NE2 4HH, UK; <sup>46</sup> The MRC Centre for Causal Analyses in Translational Epidemiology, Bristol University, Canyng Hall, Whiteladies Rd, Bristol BS2 8PR, UK; <sup>47</sup> MRC Laboratories, Fajara, The Gambia; <sup>48</sup> Diamantina Institute for Cancer, Immunology and Metabolic Medicine, Princess Alexandra Hospital, University of Queensland, Woolloongabba, Qld 4102, Australia; <sup>49</sup> Botnar Research Centre, University of Oxford, Headington, Oxford OX3 7BN, UK; <sup>50</sup> Department of Medicine, Division of Medical Sciences, Institute of Biomedical Research, University of Birmingham, Edgbaston, Birmingham B15 2TT, UK; <sup>51</sup> Section of Cancer Genetics, Institute of Cancer Research, 15 Cotswold Road, Sutton, SM2 5NG, UK; <sup>52</sup> Cancer Genome Project, The Wellcome Trust Sanger Institute, Wellcome Trust Genome Campus, Hinxton, Cambridge CB10 1SA, UK; <sup>53</sup> Department of Clinical Neurosciences, University of Cambridge, Addenbrooke's Hospital, Hills Road, Cambridge CB2 2QQ, UK; <sup>54</sup> PRESENT ADDRESS: Illumina Cambridge, Chesterford Research Park, Little Chesterford, Nr Saffron Walden, Essex, CB10 1XL, UK.
